# Supplementary material for: Tuning the Mechanical and Thermal Properties of Hydroxypropyl Methylcellulose Cryogels with the Aid of Surfactants
Source: MDPI journal article supplement (doi:10.3390/gels7030118), 2021-08-11
Supplement: s1 [file s1]

## Supplementary Material

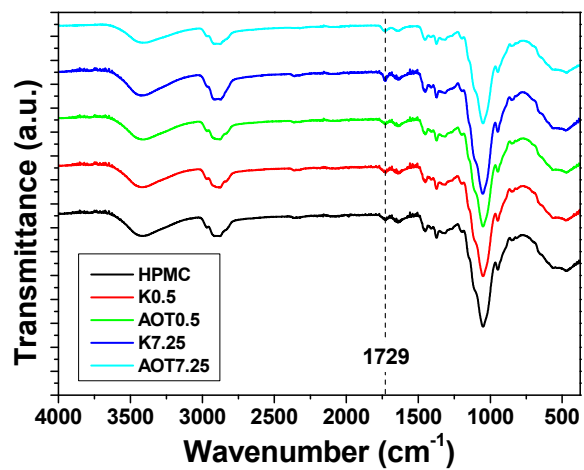

(a)

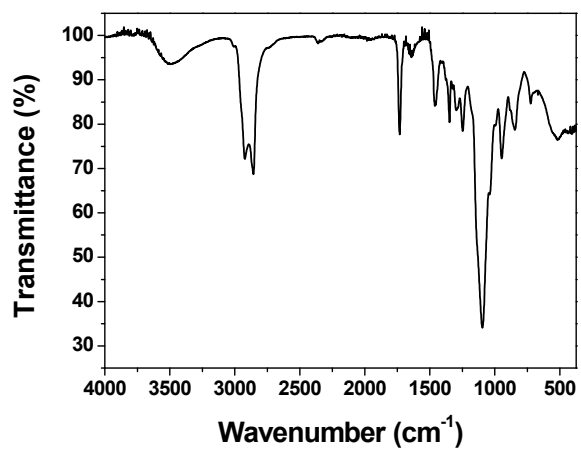

pure Kolliphor<sup>®</sup> EL

(b)

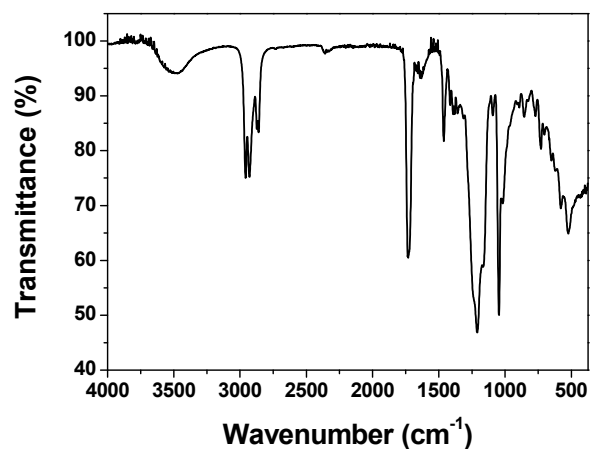

pure AOT

(c)

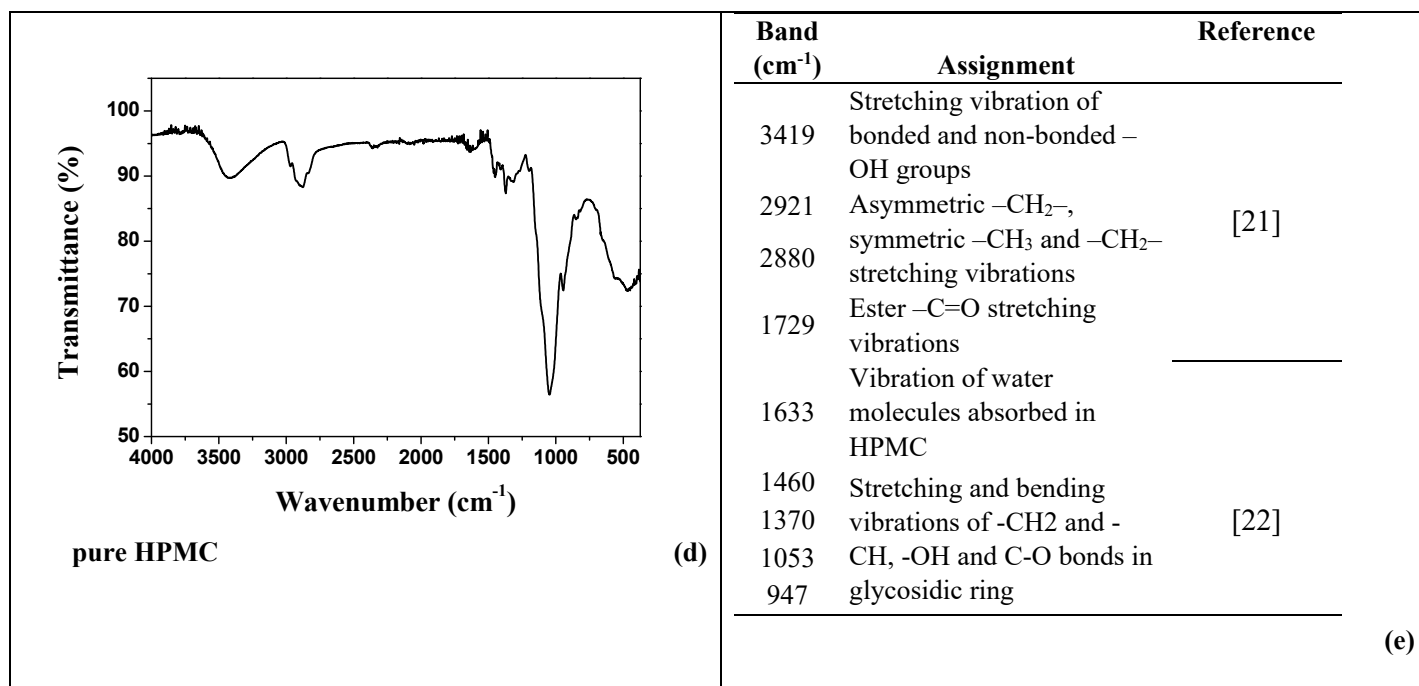

**Figure S1.** FTIR-ATR spectra (128 scans, 2 cm<sup>-1</sup> resolution) of (a) HPMC, K0.5, K7.25, AOT0.5 and AOT7.25 cryogels, (b) pure Kolliphor® EL, (c) pure AOT, (d) pure HPMC and (e) band assignments.

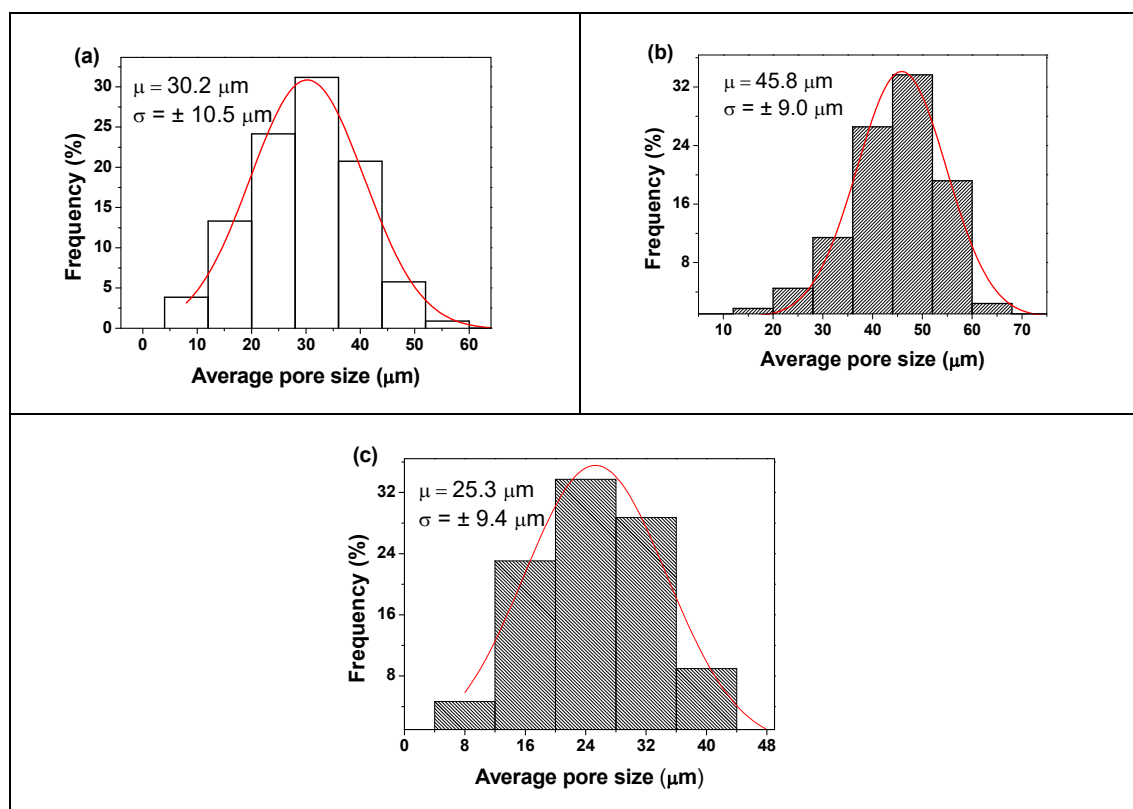

**Figure S2.** Histograms of average pore size calculated by the software CTan<sup>®</sup> for (A) HPMC, (B) K7.25 and (C) AOT7.25 cryogel samples.

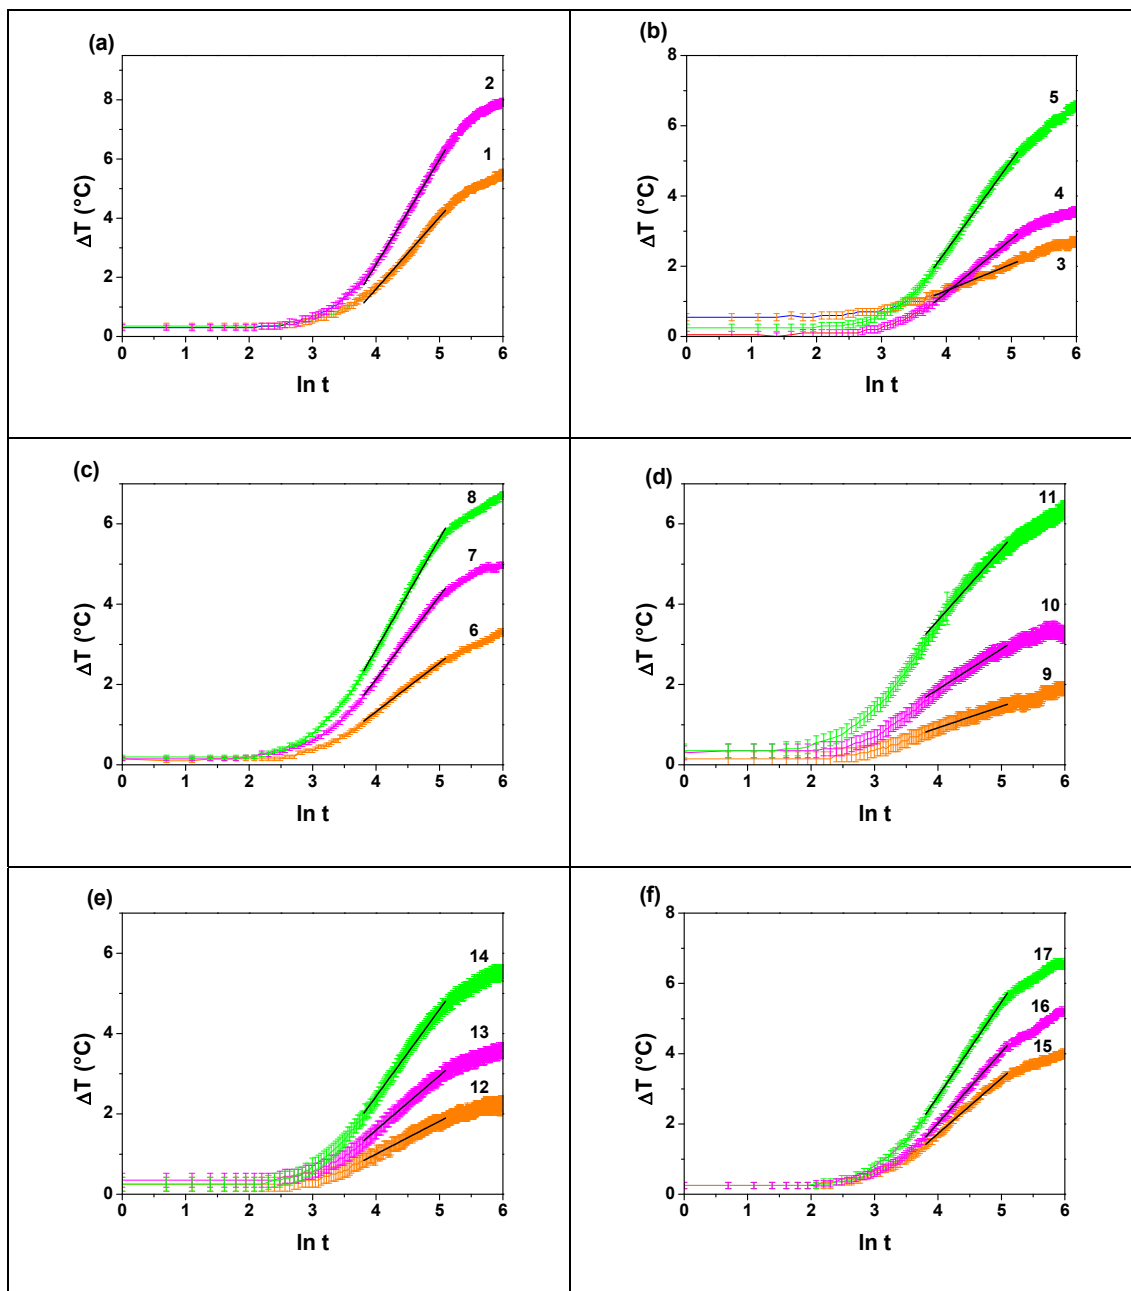

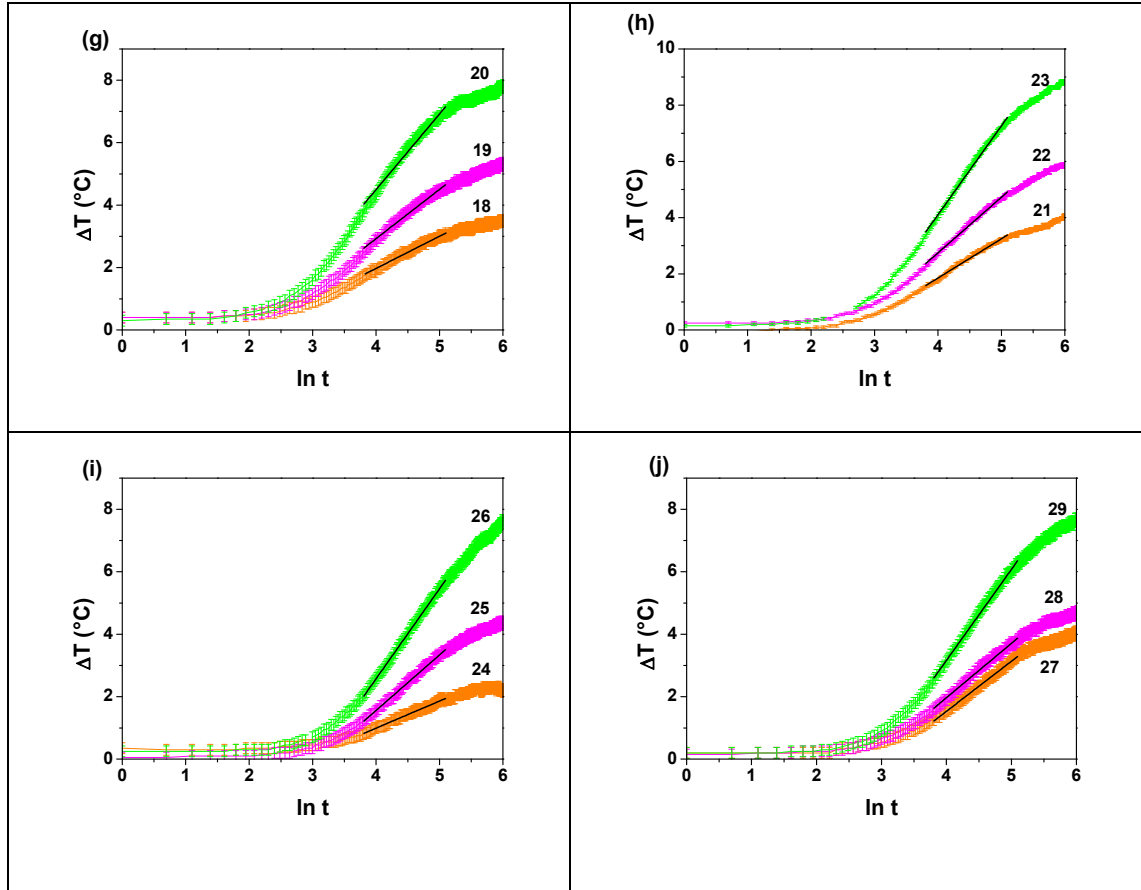

| Curve | Electric power supplied<br>P (W) | Linear region |              |                | Uncorrected<br>thermal conductivity<br>$k$ (W.m <sup>-1</sup> .°C <sup>-1</sup> ) |
|-------|----------------------------------|---------------|--------------|----------------|-----------------------------------------------------------------------------------|
|       |                                  | Slope         | Intercept    | R <sup>2</sup> |                                                                                   |
| 1     | 2.17 ± 0.04                      | 2.43 ± 0.02   | -11.8 ± 0.1  | 0.99343        | 0.071 ± 0.002                                                                     |
| 2     | 3.11 ± 0.05                      | 3.55 ± 0.02   | -8.1 ± 0.1   | 0.99843        | 0.070 ± 0.001                                                                     |
| 3     | 1.16 ± 0.03                      | 0.75 ± 0.02   | -1.7 ± 0.1   | 0.98026        | 0.123 ± 0.004                                                                     |
| 4     | 2.84 ± 0.06                      | 1.52 ± 0.02   | -4.8 ± 0.1   | 0.99622        | 0.093 ± 0.002                                                                     |
| 5     | 3.22 ± 0.07                      | 2.56 ± 0.02   | -7.8 ± 0.1   | 0.99577        | 0.100 ± 0.002                                                                     |
| 6     | 1.48 ± 0.02                      | 1.21 ± 0.01   | -3.53 ± 0.05 | 0.99387        | 0.177 ± 0.017                                                                     |
| 7     | 2.28 ± 0.02                      | 2.07 ± 0.01   | -6.14 ± 0.05 | 0.99653        | 0.177 ± 0.016                                                                     |
| 8     | 3.06 ± 0.02                      | 2.76 ± 0.01   | -8.14 ± 0.05 | 0.99536        | 0.177 ± 0.015                                                                     |
| 9     | 1.38 ± 0.04                      | 0.53 ± 0.04   | -1.2 ± 0.2   | 0.98576        | 0.205 ± 0.006                                                                     |
| 10    | 1.81 ± 0.03                      | 1.00 ± 0.04   | -2.1 ± 0.2   | 0.98360        | 0.143 ± 0.002                                                                     |
| 11    | 3.12 ± 0.04                      | 1.78 ± 0.04   | -3.5 ± 0.2   | 0.98204        | 0.139 ± 0.002                                                                     |
| 12    | 1.45 ± 0.06                      | 0.82 ± 0.04   | -2.3 ± 0.2   | 0.98578        | 0.118 ± 0.005                                                                     |
| 13    | 2.06 ± 0.01                      | 1.35 ± 0.04   | -3.8 ± 0.2   | 0.99489        | 0.121 ± 0.007                                                                     |
| 14    | 2.90 ± 0.02                      | 2.17 ± 0.04   | -6.2 ± 0.2   | 0.99356        | 0.106 ± 0.001                                                                     |
| 15    | 1.90 ± 0.02                      | 1.57 ± 0.01   | -4.56 ± 0.05 | 0.99332        | 0.096 ± 0.001                                                                     |
| 16    | 2.10 ± 0.02                      | 2.02 ± 0.01   | -6.07 ± 0.04 | 0.99814        | 0.090 ± 0.001                                                                     |
| 17    | 3.03 ± 0.04                      | 2.68 ± 0.01   | -2.68 ± 0.04 | 0.99753        | 0.083 ± 0.001                                                                     |

|    |                 |                 |                  |         |                   |
|----|-----------------|-----------------|------------------|---------|-------------------|
| 18 | $1.49 \pm 0.01$ | $1.03 \pm 0.01$ | $-2.14 \pm 0.05$ | 0.98796 | $0.114 \pm 0.004$ |
| 19 | $2.25 \pm 0.02$ | $1.57 \pm 0.02$ | $-3.38 \pm 0.08$ | 0.98744 | $0.110 \pm 0.003$ |
| 20 | $3.25 \pm 0.03$ | $2.42 \pm 0.03$ | $-5.2 \pm 0.1$   | 0.98573 | $0.104 \pm 0.002$ |
| 21 | $1.70 \pm 0.05$ | $1.39 \pm 0.01$ | $-3.74 \pm 0.05$ | 0.99002 | $0.097 \pm 0.003$ |
| 22 | $2.14 \pm 0.02$ | $1.98 \pm 0.01$ | $-5.17 \pm 0.05$ | 0.99356 | $0.086 \pm 0.001$ |
| 23 | $1.97 \pm 0.03$ | $3.16 \pm 0.01$ | $-8.56 \pm 0.05$ | 0.99496 | $0.092 \pm 0.002$ |
| 24 | $1.07 \pm 0.01$ | $0.87 \pm 0.04$ | $-2.5 \pm 0.2$   | 0.98797 | $0.100 \pm 0.001$ |
| 25 | $1.97 \pm 0.02$ | $1.78 \pm 0.04$ | $-5.6 \pm 0.2$   | 0.99722 | $0.092 \pm 0.002$ |
| 26 | $3.11 \pm 0.01$ | $2.88 \pm 0.04$ | $-9.0 \pm 0.2$   | 0.99861 | $0.093 \pm 0.001$ |
| 27 | $1.11 \pm 0.01$ | $1.60 \pm 0.04$ | $-4.9 \pm 0.2$   | 0.99743 | $0.177 \pm 0.004$ |
| 28 | $1.92 \pm 0.01$ | $1.73 \pm 0.04$ | $-5.0 \pm 0.2$   | 0.99389 | $0.109 \pm 0.001$ |
| 29 | $2.98 \pm 0.02$ | $2.91 \pm 0.04$ | $-8.5 \pm 0.2$   | 0.99712 | $0.097 \pm 0.001$ |

**Figure S3.**  $\Delta T$  vs  $\ln t$  obtained at  $23.7 \pm 0.7$  °C for (a) reference (PU); (b) HPMC; (c) K0.5; (d) K2.75; (e) K5; (f) K7.25; (g) AOT0.5; (h) AOT 2.75; (i) AOT5; (j) AOT7.25.  $P$  is the measured supplied electric power and  $k$  is the calculated thermal conductivity. The linear region considered was between 46 ( $\ln t = 3.83$ ) and 164 ( $\ln t = 5.10$ ) s.

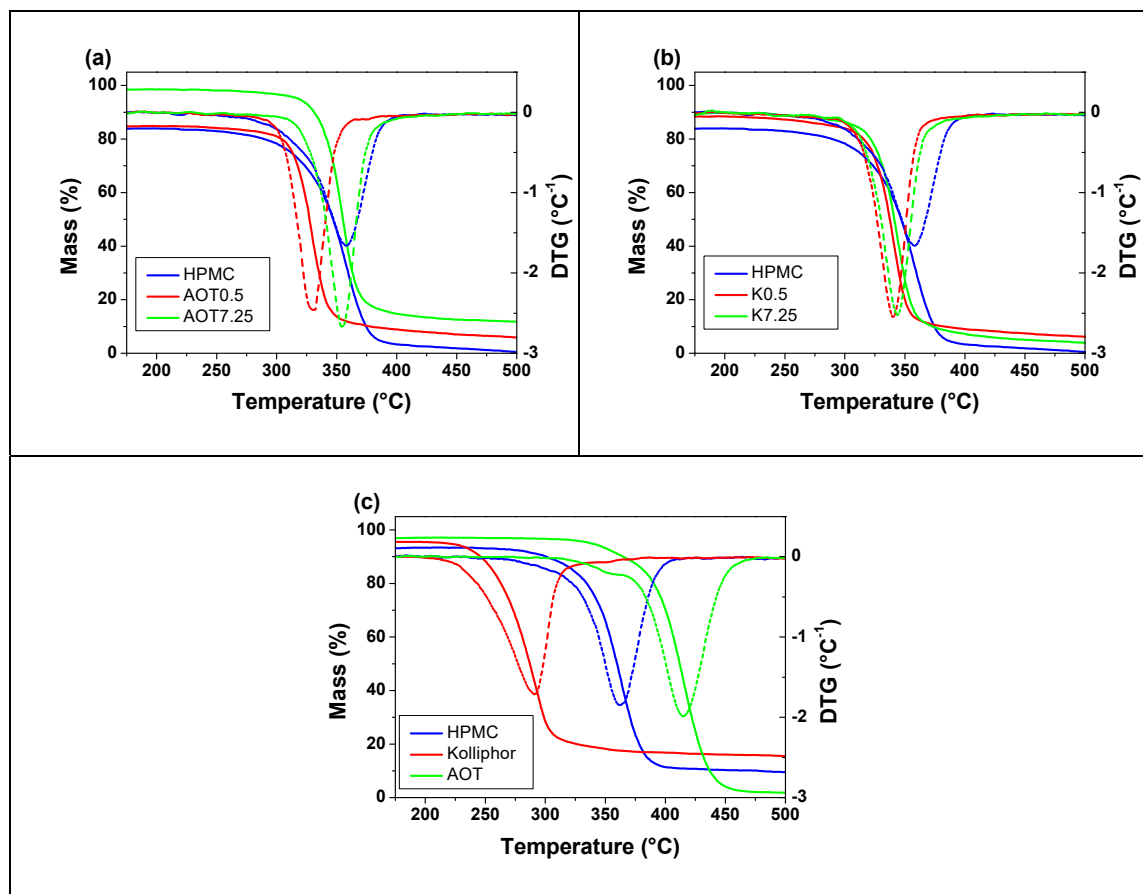

**Figure S4.** TG/DTG curves from 170-500 °C measured for cryogel samples containing (a) AOT, (b) Kolliphor and (c) pure HPMC (powder), AOT and Kolliphor® EL. The dotted lines represent DTG curves

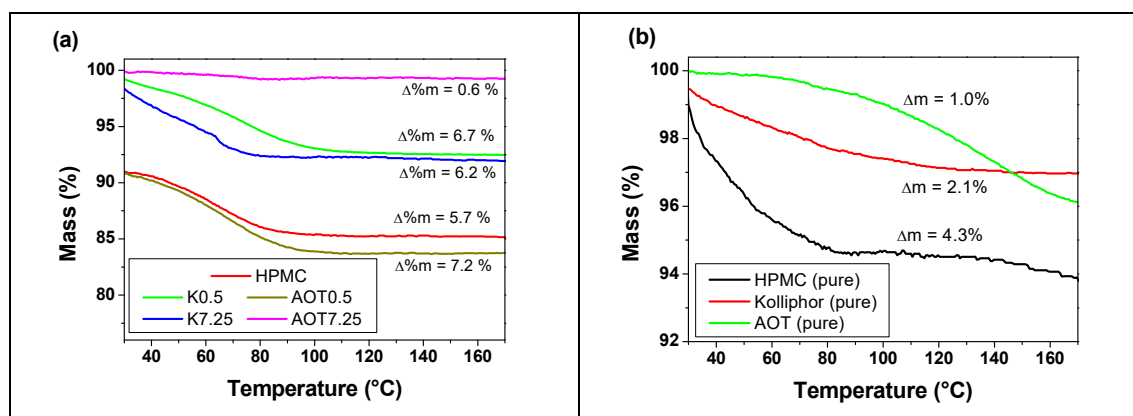

**Figure S5.** TG curves from 30-170 °C. (a) HPMC, AOT0.5, K0.5, AOT7.25 and K7.25 cryogels and (b) pure HPMC (powder), Kolliphor and AOT.

| Sample  | Mass of dried sample,<br>$m_{\text{pol}}$ (mg) | Mass of sorbed water, $m_{\text{water}}$<br>( $g_{\text{water}}$ ) | Swelling<br>degree, SD<br>( $g_{\text{water}}/g$ ) |
|---------|------------------------------------------------|--------------------------------------------------------------------|----------------------------------------------------|
| HPMC    | $43.0 \pm 0.1$                                 | $1.397 \pm 0.003$                                                  | $32 \pm 1$                                         |
| K0.5    | $42.3 \pm 0.1$                                 | $1.279 \pm 0.002$                                                  | $30 \pm 1$                                         |
| K7.25   | $38.3 \pm 0.1$                                 | $1.226 \pm 0.007$                                                  | $32 \pm 1$                                         |
| AOT0.5  | $44.6 \pm 0.1$                                 | $1.287 \pm 0.008$                                                  | $29 \pm 1$                                         |
| AOT7.25 | $44.4 \pm 0.1$                                 | $0.971 \pm 0.006$                                                  | $22 \pm 1$                                         |

Mass of sorbed MilliQ water (pH 5.5) measured as a function of time at  $21.0 \pm 0.5$  °C with Krüss K100 tensiometer.

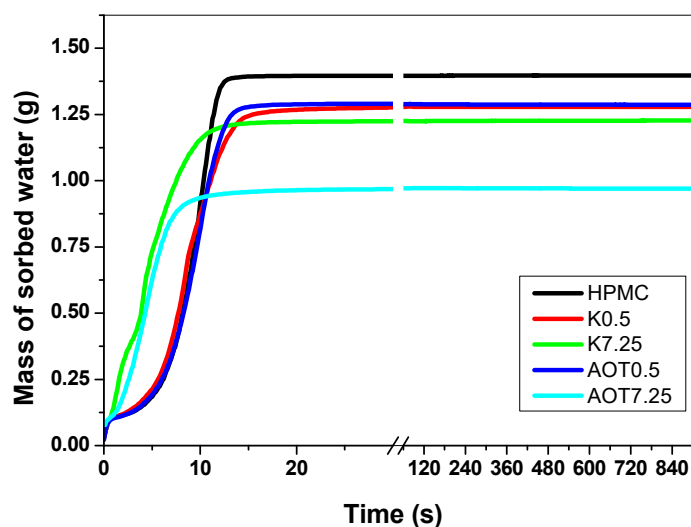

**Figure S6.** Mass of dried sample, mass of sorbed Milli-Q water and swelling degree (SD) at equilibrium determined for HPMC (blank), and HPMC cryogels prepared with the lowest (K0.5 and AOT 0.5) and highest (K7.25 and AOT7.25) surfactant concentration.

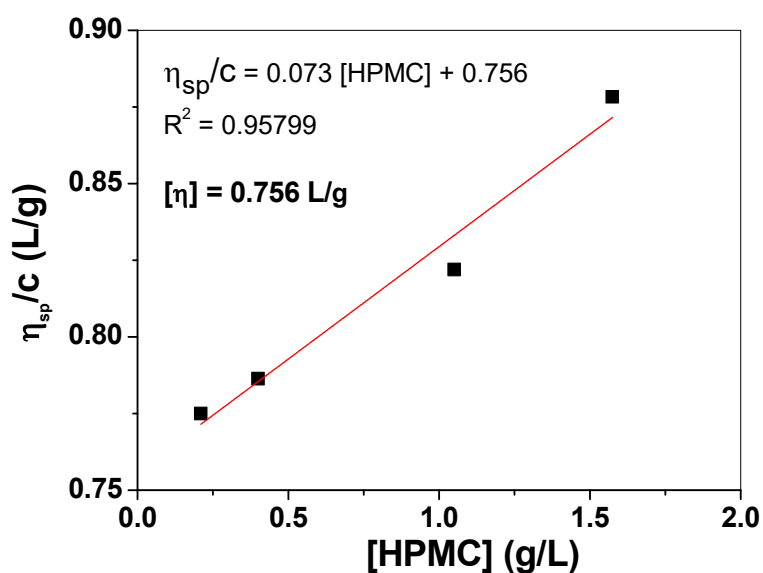

**Figure S7.** Reduced viscosity  $\eta_{sp}/c$  as a function of HPMC J12MS concentration. Intrinsic viscosity ( $[\eta]$ ) is the intercept of the fitted linear curve.  $M_v$  is the viscometric average molar mass and can be obtained by using the Mark-Houwink-Sakurada equation,  $[\eta] = KM_v^a$ , where  $K$  and  $a$  are constants.  $K = 0.000172$  and  $a = 0.838$  for the HPMC-water system [38], resulting in  $M_v = 3.46 \times 10^5 \text{ g.mol}^{-1}$ .



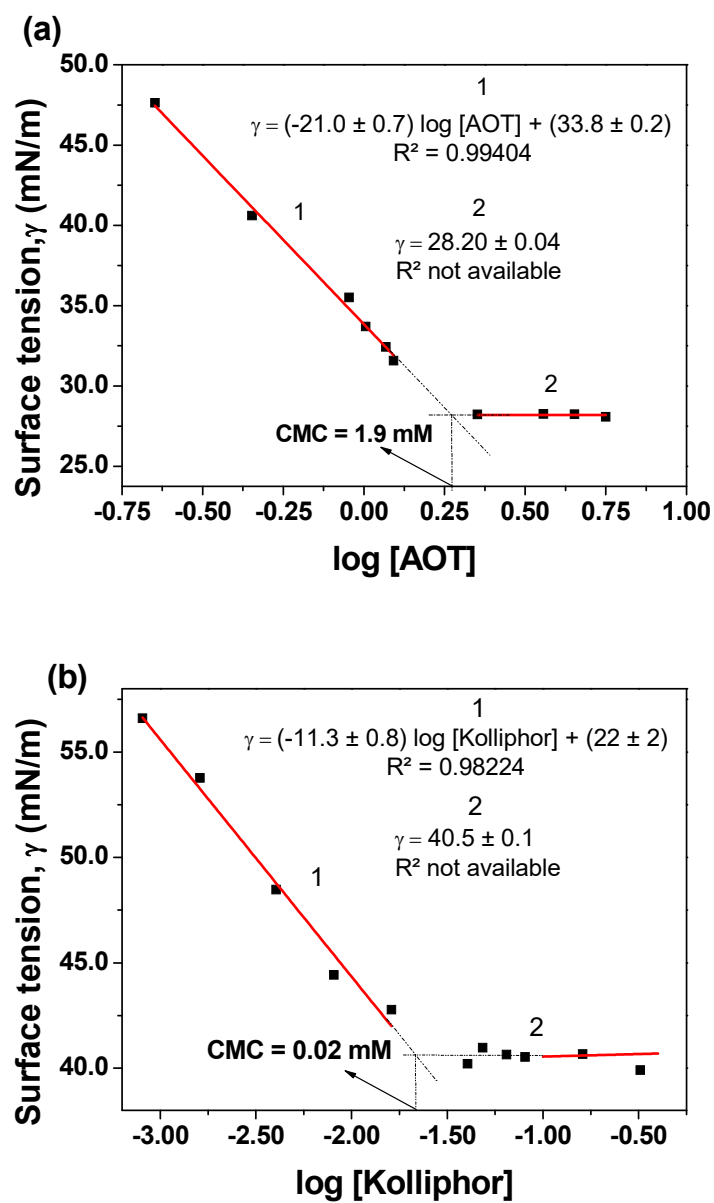

**Figure S8.** Surface tension ( $\gamma$ ) vs logarithm of the concentration (mM) of (a) AOT and (b) Kolliphor® EL aqueous solutions, determined at  $21 \pm 1$  °C, by Du Noüy ring method in a Krüss K100 tensiometer.

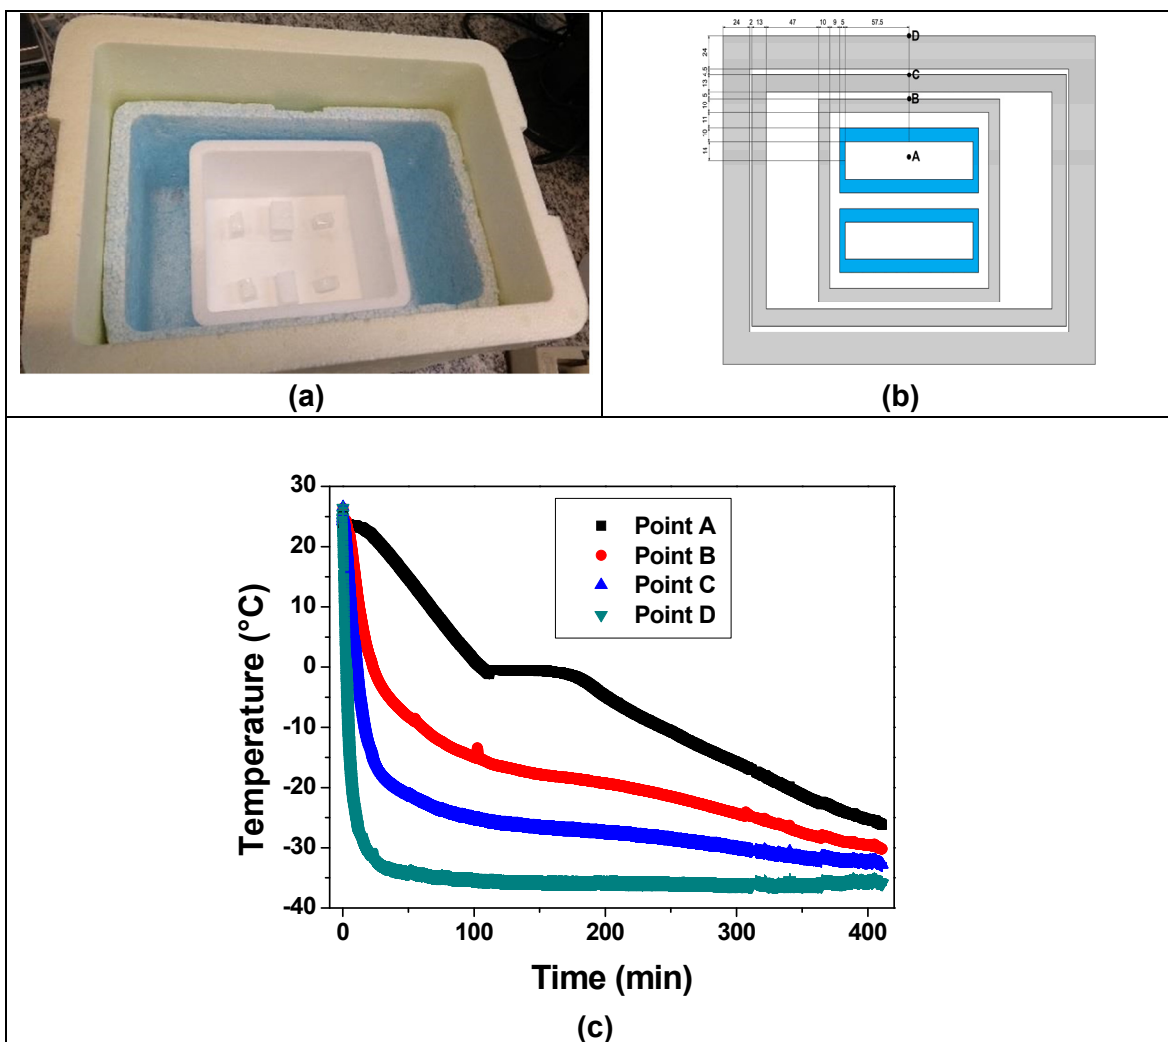

**Figure S9.** (a) Styrofoam boxes arranged for the precursor gels freezing, (b) top view representation of boxes (gray) with the distances, in millimeters, among the molds (symmetrically positioned in the center) and boxes, as well as their wall thickness and size. (c) The temperature of points A (hydrogel sample in mold A), B, C and D (outer surface of each box) was measured by thermistors as a function of time.

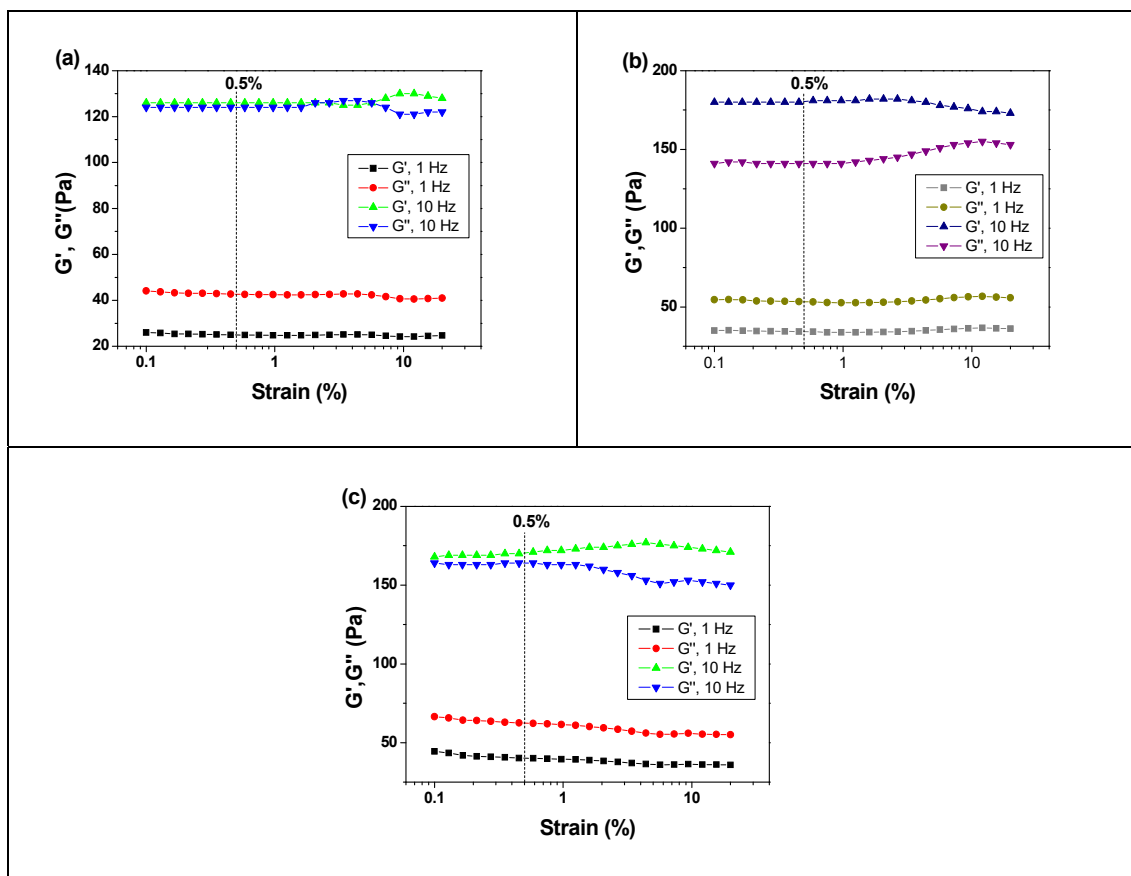

**Figure S10.** Storage ( $G'$ ) and loss ( $G''$ ) moduli obtained by DSST tests for hydrogels of (a) HPMC (control), (b) K7.25 and (c) AOT7.25 hydrogels at frequencies of 1 and 10 Hz.

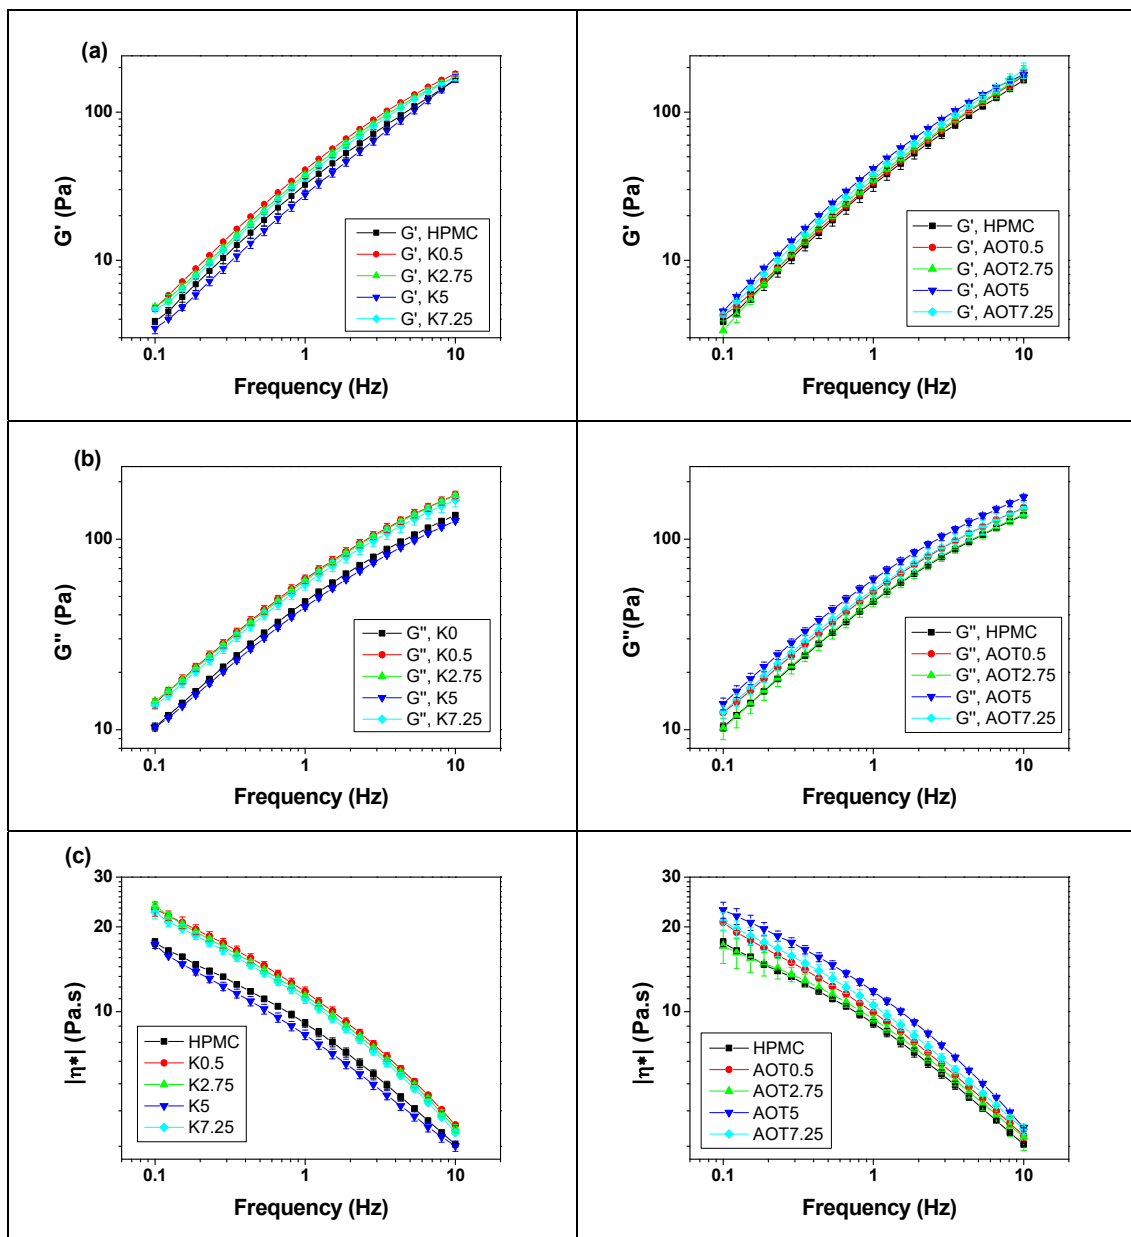

**Figure S11.** Curves obtained by the SAOS tests performed at  $(25.0 \pm 0.5) ^\circ\text{C}$ . (a) Storage modulus,  $G'$ , (b) loss modulus,  $G''$ , (c)  $G'$  and  $G''$  and (d) complex viscosity,  $|\eta^*|$  of HPMC (blank), K0.5, AOT0.5, K2.75, AOT2.75, K5, AOT5, K7.25 and AOT7.25 precursor hydrogels.
